# Supplementary material
Source: publisher figshare collection journal article supplement (https://springernature.figshare.com/ndownloader/files/31091618)
Supplement: Supplementary file 1 [file 31091618]

## Sheet: README
Additional file 5 to Soininen et al Environmental Evidence -- Plant functional group data aggregated from raw data
Datasheet	Description
PFTs-systematic-herbivory-map	information on the presence/absence of plant functional groups for each study
comments	notes and observations recorded during the coding process

## Sheet: PFTs-systematic-herbivory-map
evidence_point_ID	evergreen_dwarf_shrubs	deciduous_dwarf_shrubs	deciduous_tall_shrubs	evergreen_tall_shrubs	deciduous_trees	evergreen_trees	graminoids	forbs	ferns_and_allies	bryophytes	vascular_plant_community	lichens	original_study_text_checked	original_scored_data	comments
3_a	no	no	no	no	no	no	no	no	no	no	yes	no
13_a	yes	yes	no	no	no	no	yes	no	no	yes	no	no
23_a	yes	yes	no	no	no	no	yes	yes	yes	yes	no	yes			cryptogams
25_a	no	no	no	no	yes	yes	no	no	no	no	no	no
25_b	no	no	no	no	yes	yes	no	no	no	no	no	no
25_c	no	no	no	no	yes	yes	no	no	no	no	no	no
25_d	no	no	no	no	yes	yes	no	no	no	no	no	no
26_a	yes	yes	no	no	no	no	yes	yes	no	yes	no	yes
28_a	yes	yes	no	no	no	no	yes	yes	no	yes	no	no	x	forbs, grasses, sedges, deciduous_shrubs, evergreen_shrubs, vascular_cryptogams, Empetrum_nigrum, total_community
30_a	no	yes	no	no	no	no	yes	no	no	no	no	no
44_a	yes	yes	yes	no	no	no	yes	yes	yes	no	no	no	x	Salix_spp, Betula_nana, graminoids, forbs, evergreen_dwarf_shrubs, deciduous_dwarf_shrubs, pteridophytes, bryophytes	Salix glauca, salix lapponum
45_a	no	yes	no	no	no	no	no	yes	no	no	no	no
50_a	yes	yes	no	no	no	no	no	no	no	no	no	no
54_a	no	yes	no	no	no	no	no	yes	no	no	no	no
54_b	no	yes	no	no	no	no	yes	no	no	no	no	no
56_a	no	no	no	no	no	no	no	yes	no	no	no	no
78_a	yes	yes	yes	yes	yes	no	yes	yes	no	yes	no	yes	x	deciduous_shrubs, evergreen_shrubs, forbs, graminoids, mosses, liverworts, Sphagnum_spp, lichens
78_b	yes	yes	yes	yes	yes	no	yes	yes	no	yes	no	yes	--	deciduous_shrubs, evergreen_shrubs, forbs, graminoids, mosses, liverworts, Sphagnum_spp, lichens
78_c	yes	yes	yes	yes	yes	no	yes	yes	no	yes	no	yes	--	deciduous_shrubs, evergreen_shrubs, forbs, graminoids, mosses, liverworts, Sphagnum_spp, lichens
78_d	yes	yes	yes	yes	yes	no	yes	yes	no	yes	no	yes	--	deciduous_shrubs, evergreen_shrubs, forbs, graminoids, mosses, liverworts, Sphagnum_spp, lichens
87_a	no	yes	yes	no	no	no	no	no	no	no	no	no
88_a	no	yes	no	no	no	no	no	no	no	no	no	no
122_a	yes	yes	no	no	no	no	yes	yes	no	yes	no	no
130_a	no	no	yes	no	no	no	no	no	no	no	no	no			Alnus viridis grouped into decidious tall shrubs
161_a	no	yes	no	no	no	no	yes	yes	no	yes	no	no
175_a	yes	yes	no	no	no	no	no	yes	no	no	no	no
192_a	yes	yes	no	no	no	no	yes	no	no	no	no	no
199_a	no	no	yes	no	no	no	no	no	no	no	no	no
216_a	no	no	no	no	no	no	no	no	no	no	yes	no
217_a	no	no	no	no	no	no	no	no	no	no	yes	no
217_b	no	no	no	no	no	no	no	no	no	no	yes	no
217_c	no	no	no	no	no	no	no	no	no	no	yes	no
217_d	no	no	no	no	no	no	no	no	no	no	yes	no
217_e	no	no	no	no	no	no	no	no	no	no	yes	no
217_f	no	no	no	no	no	no	no	no	no	no	yes	no
217_g	no	no	no	no	no	no	no	no	no	no	yes	no
217_h	no	no	no	no	no	no	no	no	no	no	yes	no
217_i	no	no	no	no	no	no	no	no	no	no	yes	no
217_j	no	no	no	no	no	no	no	no	no	no	yes	no
217_k	no	no	no	no	no	no	no	no	no	no	yes	no
234_a	no	yes	no	no	no	no	no	no	no	yes	no	no
234_b	no	yes	no	no	no	no	no	no	no	no	no	no
234_c	no	no	no	no	no	no	no	no	no	no	yes	no
239_a	no	no	no	no	no	no	no	no	no	yes	yes	no
252_a	no	no	no	no	no	no	no	no	no	no	yes	no
252_b	no	no	no	no	no	no	no	no	no	no	yes	no
255_a	yes	yes	no	no	no	no	yes	yes	no	yes	no	yes
258_a	no	no	no	no	no	no	no	no	no	no	yes	no
288_a	yes	yes	no	no	no	no	yes	yes	no	no	no	no
288_b	yes	yes	no	no	no	no	yes	yes	no	no	no	no
288_c	yes	yes	no	no	no	no	yes	yes	no	no	no	no
288_d	yes	yes	no	no	no	no	yes	yes	no	no	no	no
290_a	no	no	no	no	no	no	yes	yes	yes	no	no	no
299_a	yes	yes	yes	yes	no	yes	yes	yes	no	yes	no	yes
300_a	yes	yes	yes	yes	no	yes	yes	yes	no	yes	no	yes
307_a	no	yes	yes	no	no	no	no	no	no	no	no	no		Salix_alaxensis, Salix_arbusculoides, Salix_glauca/niphochlada, Salix_pulchra, Salix_richardsonii, Alnus_sp, Betula_nana
364_a	yes	yes	no	no	no	no	yes	yes	no	yes	no	yes	x	woody_plants, shrubs, other
371_a	yes	no	no	no	no	no	yes	yes	no	no	no	no
380_a	no	yes	no	no	no	no	no	no	no	no	no	no
408_a	no	no	no	no	no	no	no	no	no	no	yes	no
411_a	yes	yes	no	no	no	no	yes	no	no	yes	no	yes	x	lichens, deciduous_shrubs, evergreen_shrubs, graminoids, mosses
411_b	yes	yes	no	no	no	no	yes	no	no	yes	no	yes	--	lichens, deciduous_shrubs, evergreen_shrubs, graminoids, mosses
411_c	yes	yes	no	no	no	no	yes	no	no	yes	no	yes	--	lichens, deciduous_shrubs, evergreen_shrubs, graminoids, mosses
411_d	yes	yes	no	no	no	no	yes	no	no	yes	no	yes	--	lichens, deciduous_shrubs, evergreen_shrubs, graminoids, mosses
420_a	yes	yes	no	no	no	no	yes	yes	no	yes	no	yes	x	dwarf_shrub, shrub_mat
422_a	no	yes	no	no	no	no	no	no	no	no	no	no
422_b	no	yes	no	no	no	no	no	no	no	no	no	no
422_c	no	yes	no	no	no	no	no	no	no	no	no	no
424_a	no	yes	no	no	no	no	yes	yes	no	yes	no	yes	x	shrubs, graminoids, forbs, lichens, bryophytes	PFT group reported as "shrubs" but no mention of evergreen shrubs - only the deciduous Vaccinium myrtillus
424_b	no	yes	no	no	no	no	yes	yes	no	yes	no	yes	--	shrubs, graminoids, forbs, lichens, bryophytes	PFT reported as "shrubs" but no mention of evergreen shrubs - only the deciduous Vaccinium myrtillus
442_a	yes	yes	no	no	no	no	yes	yes	no	yes	no	yes	x	deciduous_shrubs, evergreen_shrubs, graminoids, forbs, lichens, bryophytes
470_a	yes	yes	yes	no	no	no	yes	yes	no	no	no	no
470_b	yes	yes	yes	no	no	no	yes	yes	no	no	no	no
470_c	yes	yes	yes	no	no	no	yes	yes	no	no	no	no
471_a	no	no	no	no	no	no	no	yes	no	no	no	no
520_a	yes	yes	no	no	no	no	yes	yes	no	yes	no	yes	x	graminoids, forbs, deciduous_shrubs, evergreen_shrubs, mosses, lichens
520_b	yes	yes	no	no	no	no	yes	yes	no	yes	no	yes	--	graminoids, forbs, deciduous_shrubs, evergreen_shrubs, mosses, lichens
525_a	yes	yes	no	no	no	no	yes	yes	no	yes	no	yes
528_a	yes	yes	no	no	no	no	yes	yes	no	no	no	no	x	forbs, grasses, sedges, deciduous_shrubs, evergreen_shrubs, Empetrum_nigrum
533_a	no	yes	yes	no	no	no	no	no	no	no	no	no		Salix_alaxensis, Salix_pulchra, Salix_glauca/niphoclada, Salix_lanata, Alnus_viridis, Betula nana
533_b	no	yes	yes	no	no	no	no	no	no	no	no	no		Salix_alaxensis, Salix_pulchra, Salix_glauca/niphoclada, Salix_lanata, Alnus_viridis, Betula nana
546_a	no	no	no	no	no	no	yes	no	yes	no	no	no
557_a	no	no	no	no	yes	yes	no	no	no	no	no	no
561_a	yes	yes	no	no	no	no	no	no	no	yes	yes	yes
588_a	yes	yes	no	no	no	no	no	no	no	no	no	no
604_a	no	no	no	no	no	no	no	no	no	no	yes	no
614_a	no	no	no	no	no	no	yes	no	no	no	no	no
619_a	no	no	no	no	no	no	no	no	no	no	yes	no
630_a	yes	no	no	no	no	no	no	no	no	no	no	no
645_a	yes	yes	no	no	no	no	no	yes	no	yes	no	yes
656_a	no	no	no	no	no	no	no	no	no	no	no	yes
698_a	no	no	no	no	no	no	yes	no	no	no	no	no
699_a	no	yes	no	no	no	no	yes	yes	no	yes	yes	no
699_b	no	yes	no	no	no	no	yes	yes	no	yes	yes	no
700_a	no	no	no	no	yes	no	no	no	no	no	no	no
700_b	no	no	no	no	no	no	no	no	no	no	no	no
709_a	no	no	yes	no	no	no	no	no	no	no	no	no		Salix_alaxensis
709_b	no	no	yes	no	no	no	no	no	no	no	no	no		Salix_alaxensis
723_a	yes	yes	no	no	no	no	yes	yes	no	no	no	no
723_b	yes	yes	no	no	no	no	yes	yes	no	no	no	no
728_a	yes	yes	no	no	no	no	yes	yes	no	yes	no	yes
728_b	yes	yes	no	no	no	no	yes	yes	no	yes	no	yes
735_a	yes	yes	yes	no	yes	no	yes	yes	no	yes	no	yes	x	graminoids, forbs, evergreen_ericoids, deciduous_woody_plants, tall_robust_bryophytes, small_bryophytes, lichens	deciduous_woody_plants - no mention of species, all three columns with deciduous woody plants therefore marked
735_b	yes	yes	yes	no	yes	no	yes	yes	no	yes	no	yes	--	graminoids, forbs, evergreen_ericoids, deciduous_woody_plants, tall_robust_bryophytes, small_bryophytes, lichens	deciduous_woody_plants - no mention of species, all three columns with deciduous woody plants therefore marked
740_a	no	no	no	no	no	no	no	yes	no	no	no	no
740_b	no	no	no	no	no	no	no	yes	no	no	no	no
757_a	no	no	no	no	no	no	no	no	no	no	no	no
763_a	yes	yes	no	no	no	no	yes	yes	no	yes	no	yes
763_b	yes	yes	no	no	no	no	yes	yes	no	yes	no	yes
766_a	yes	yes	yes	no	no	no	no	no	no	no	no	no	x	shrubs
770_a	no	no	yes	no	no	no	no	no	no	no	no	no
770_b	no	no	yes	no	no	no	no	no	no	no	no	no
770_c	no	no	yes	no	no	no	no	no	no	no	no	no
773_a	yes	yes	no	no	no	no	yes	yes	no	yes	no	yes
852_a	no	no	no	no	no	no	no	no	no	no	yes	no
852_b	no	no	no	no	no	no	no	no	no	no	yes	no
865_a	no	yes	no	no	no	no	no	no	no	no	no	no
873_a	no	no	no	no	yes	no	no	no	no	no	no	no
873_b	no	no	no	no	yes	no	no	no	no	no	no	no
873_c	no	no	no	no	yes	no	no	no	no	no	no	no
873_d	no	no	no	no	yes	no	no	no	no	no	no	no
873_e	no	no	no	no	yes	no	no	no	no	no	no	no
873_f	no	no	no	no	yes	no	no	no	no	no	no	no
873_g	no	no	no	no	yes	no	no	no	no	no	no	no
873_h	no	no	no	no	yes	no	no	no	no	no	no	no
873_i	no	no	no	no	yes	no	no	no	no	no	no	no
873_j	no	no	no	no	yes	no	no	no	no	no	no	no
873_k	no	no	no	no	yes	no	no	no	no	no	no	no
873_l	no	no	no	no	yes	no	no	no	no	no	no	no
874_a	no	no	no	no	yes	no	no	no	no	no	no	no
877_a	no	no	no	no	no	no	yes	no	no	no	no	no
877_b	no	no	no	no	no	no	yes	no	no	no	no	no
878_a	yes	yes	yes	no	no	no	no	no	no	no	yes	no	x	shrubs	This is the description in the paper: "dwarf heath, mires, meadows, deciduous shrubs, and some evergreen (Juniperus communis L.)"
878_b	yes	yes	yes	no	no	no	no	no	no	no	yes	no	--	shrubs
878_c	yes	yes	yes	no	no	no	no	no	no	no	yes	no	--	shrubs
879_a	no	yes	no	no	yes	no	yes	yes	no	yes	no	no
881_a	yes	yes	yes	no	yes	no	yes	yes	yes	yes	no	no	x	Betula_pubescens, Empetrum_nigrum, Vaccinium _myrtillus, Chamaepericlymenum_suecicum, Salix_spp	information changed from scored data - data taken from Table 1
881_b	yes	yes	yes	no	no	no	yes	yes	yes	yes	no	no	--	Betula_pubescens, Empetrum_nigrum, Vaccinium _myrtillus, Chamaepericlymenum_suecicum, Salix_spp	information changed from scored data - data taken from Table 1
881_c	yes	yes	yes	no	no	no	yes	yes	yes	yes	no	no	--	Betula_pubescens, Empetrum_nigrum, Vaccinium _myrtillus, Chamaepericlymenum_suecicum, Salix_spp	information changed from scored data - data taken from Table 1
881_d	yes	yes	yes	no	no	no	yes	yes	yes	yes	no	no	--	Betula_pubescens, Empetrum_nigrum, Vaccinium _myrtillus, Chamaepericlymenum_suecicum, Salix_spp	information changed from scored data - data taken from Table 1
888_a	no	yes	no	no	no	no	yes	yes	no	no	no	no
888_b	no	yes	no	no	no	no	yes	yes	no	no	no	no
888_c	no	yes	no	no	no	no	yes	yes	no	no	no	no
888_d	no	yes	no	no	no	no	yes	yes	no	no	no	no
895_a	no	yes	no	no	no	no	no	yes	no	no	no	no
901	no	yes	no	no	no	no	no	no	no	no	no	no
907_a	yes	yes	no	no	no	no	yes	no	no	no	yes	no
908_a	no	no	yes	no	no	no	no	no	no	no	no	no
911_a	yes	yes	no	no	no	no	yes	yes	no	yes	no	no	x	graminoid_cover, shrub_cover	Salix spp. - no mention of species, but location description states that vegetation of the study area is characterised by dwarf shrubs; only dwarf shrubs selected here.
912_a	no	no	no	no	no	no	no	yes	no	no	no	no
915_a	yes	yes	yes	no	no	no	yes	yes	yes	no	no	no	x	long species list, see fig 3.
915_b	yes	yes	yes	no	no	no	yes	yes	yes	no	no	no	--	long species list, see fig 3.
917_a	no	no	no	no	no	no	no	no	no	no	yes	no
921_a	no	yes	no	no	no	no	no	no	no	no	no	no
929_a	no	no	no	no	no	no	yes	no	no	no	no	no
929_b	no	no	no	no	no	no	yes	no	no	no	no	no
929_c	no	no	no	no	no	no	yes	no	no	no	no	no
929_d	no	no	no	no	no	no	yes	no	no	no	no	no
941_a	yes	no	no	no	no	no	no	no	no	no	no	no
949_a	yes	yes	no	no	no	no	no	no	no	no	no	no	x	shrubs
1009_a	no	no	no	no	no	no	no	no	no	no	no	no
1022_a	no	no	no	no	no	no	no	no	no	no	no	no
1022_b	no	no	no	no	no	no	no	no	no	no	no	no
1059_a	yes	yes	no	no	no	no	yes	no	no	no	no	no	x	regional
1010_a	no	yes	no	no	no	no	no	no	no	no	no	no
1036_a	no	no	no	no	yes	no	no	no	no	no	no	no
1036_b	no	no	no	no	yes	no	no	no	no	no	no	no
1036_c	no	no	no	no	yes	no	no	no	no	no	no	no
1036_d	no	no	no	no	yes	no	no	no	no	no	no	no
1036_e	no	no	no	no	yes	no	no	no	no	no	no	no
1036_f	no	no	no	no	yes	no	no	no	no	no	no	no
1036_g	no	no	no	no	yes	no	no	no	no	no	no	no
1036_h	no	no	no	no	yes	no	no	no	no	no	no	no
1036_i	no	no	no	no	yes	no	no	no	no	no	no	no
1036_j	no	no	no	no	yes	no	no	no	no	no	no	no
1036_k	no	no	no	no	yes	no	no	no	no	no	no	no
1036_l	no	no	no	no	yes	no	no	no	no	no	no	no
1060_a	no	yes	yes	no	no	no	yes	yes	yes	yes	no	yes
1060_b	no	yes	yes	no	no	no	yes	yes	yes	yes	no	yes
1060_c	no	yes	yes	no	no	no	yes	yes	yes	yes	no	yes
1060_d	no	yes	yes	no	no	no	yes	yes	yes	yes	no	yes
1060_e	no	yes	yes	no	no	no	yes	yes	yes	yes	no	yes
1074_a	no	no	no	no	no	no	no	no	no	no	yes	no
1074_b	no	no	no	no	no	no	no	no	no	no	yes	no
1088_a	yes	yes	no	no	no	no	yes	no	no	yes	no	yes	x	woody_plants, graminoids, bryophytes, lichens
1093_a	no	no	no	no	no	no	no	no	no	no	no	no
1100_a	no	yes	no	no	no	no	no	no	no	no	no	no
1146_a	no	no	no	no	yes	no	no	no	no	no	no	no
1146_b	no	no	no	no	yes	no	no	no	no	no	no	no
1146_c	no	no	no	no	yes	no	no	no	no	no	no	no
1146_d	no	no	no	no	yes	no	no	no	no	no	no	no
1146_e	no	no	no	no	yes	no	no	no	no	no	no	no
1146_f	no	no	no	no	yes	no	no	no	no	no	no	no
1162_a	no	yes	no	no	no	no	yes	no	no	no	yes	no
1175_a	no	no	yes	no	no	no	no	no	no	no	no	no	x	Salix_sp	Salix phylicifolia, Salix lanata, Salix glauca, Salix lapponium and hybrids
1175_b	no	no	yes	no	no	no	no	no	no	no	no	no	--	Salix_sp	Salix phylicifolia, Salix lanata, Salix glauca, Salix lapponium and hybrids
1175_c	no	no	yes	no	no	no	no	no	no	no	no	no	--	Salix_sp	Salix phylicifolia, Salix lanata, Salix glauca, Salix lapponium and hybrids
1176_a	no	no	yes	no	no	no	no	no	no	no	no	no	--	Salix_sp	Salix phylicifolia, Salix lanata, Salix glauca, Salix lapponium and hybrids
1176_b	no	no	yes	no	no	no	no	no	no	no	no	no	--	Salix_sp	Salix phylicifolia, Salix lanata, Salix glauca, Salix lapponium and hybrids
1176_c	no	no	yes	no	no	no	no	no	no	no	no	no	--	Salix_sp	Salix phylicifolia, Salix lanata, Salix glauca, Salix lapponium and hybrids
1182_a	no	yes	no	no	no	no	yes	yes	no	yes	no	yes
1182_b	no	yes	no	no	no	no	yes	yes	no	yes	no	yes
1182_c	no	yes	no	no	no	no	yes	yes	no	yes	no	yes
1187_a	yes	yes	no	no	no	no	yes	no	no	yes	no	yes
1187_b	yes	yes	no	no	no	no	yes	no	no	yes	no	yes
1187_c	yes	yes	no	no	no	no	yes	no	no	yes	no	yes
1190_a	no	no	no	no	no	no	yes	no	no	yes	no	no
1203_a	no	yes	no	no	no	no	yes	yes	yes	yes	no	no
1203_b	no	yes	no	no	no	no	yes	yes	yes	yes	no	no
1212_a	no	yes	no	no	no	no	yes	yes	yes	yes	no	no	x	green_moss, brown_moss, grasses, herbs, vascular_litter, equisetum, shrubs, roots
1212_b	no	yes	no	no	no	no	yes	yes	yes	yes	no	no	--	green_moss, brown_moss, grasses, herbs, vascular_litter, equisetum, shrubs, roots
1223_a	no	no	no	no	yes	no	no	no	no	no	no	no
1223_b	no	no	no	no	yes	no	no	no	no	no	no	no
1229_a	no	no	no	no	no	yes	no	no	no	no	no	no
1233_a	yes	yes	no	no	no	no	yes	yes	no	yes	no	yes
1233_b	yes	yes	no	no	no	no	yes	yes	no	yes	no	yes
1233_c	yes	yes	no	no	no	no	yes	yes	no	yes	no	yes
1233_d	yes	yes	no	no	no	no	yes	yes	no	yes	no	yes
1233_e	yes	yes	no	no	no	no	yes	yes	no	yes	no	yes
1233_f	yes	yes	no	no	no	no	yes	yes	no	yes	no	yes
1233_g	yes	yes	no	no	no	no	yes	yes	no	yes	no	yes
1233_h	yes	yes	no	no	no	no	yes	yes	no	yes	no	yes
1233_i	yes	yes	no	no	no	no	yes	yes	no	yes	no	yes
1233_j	yes	yes	no	no	no	no	yes	yes	no	yes	no	yes
1233_k	yes	yes	no	no	no	no	yes	yes	no	yes	no	yes
1254_a	no	no	no	no	no	no	yes	no	no	no	no	no
1296_a	no	no	no	no	no	no	no	no	no	no	yes	no
1300_a	yes	yes	no	no	no	no	yes	yes	no	no	no	no	x	herbaceous_dicotyledon, graminoids, shrubs
1300_b	yes	yes	no	no	no	no	yes	yes	no	no	no	no	--	herbaceous_dicotyledon, graminoids, shrubs
1300_c	yes	yes	no	no	no	no	yes	yes	no	no	no	no	--	herbaceous_dicotyledon, graminoids, shrubs
1306_a	no	yes	no	no	no	no	yes	no	no	yes	no	yes
1306_b	no	yes	no	no	no	no	yes	no	no	yes	no	yes
1309_a	no	no	no	no	yes	no	no	no	no	no	no	no
1325_a	no	no	no	no	no	yes	no	no	no	no	no	no
1325_b	no	no	no	no	no	yes	no	no	no	no	no	no
1325_c	no	no	no	no	no	yes	no	no	no	no	no	no
1329_a	yes	yes	no	no	no	no	no	no	no	no	no	no
1329_b	yes	yes	no	no	no	no	no	no	no	no	no	no
1329_c	yes	yes	no	no	no	no	no	no	no	no	no	no
1334_a	no	yes	no	no	no	no	yes	no	no	yes	no	no
1334_b	no	no	no	no	no	no	yes	no	no	yes	no	no
1337_a	no	no	no	no	no	no	yes	no	no	no	no	no
1340_a	no	no	no	no	no	no	no	no	no	yes	yes	no
1340_b	no	no	no	no	no	no	no	no	no	yes	yes	no
1340_c	no	no	no	no	no	no	no	no	no	yes	yes	no
1340_d	no	no	no	no	no	no	no	no	no	yes	yes	no
1340_e	no	no	no	no	no	no	no	no	no	yes	yes	no
1340_f	no	no	no	no	no	no	no	no	no	yes	yes	no
1340_g	no	no	no	no	no	no	no	no	no	yes	yes	no
1341_a	no	no	no	no	no	no	no	no	no	yes	yes	no
1341_b	no	no	no	no	no	no	no	no	no	yes	yes	no
1341_c	no	no	no	no	no	no	no	no	no	yes	yes	no
1341_d	no	no	no	no	no	no	no	no	no	yes	yes	no
1341_e	no	no	no	no	no	no	no	no	no	yes	yes	no
1341_f	no	no	no	no	no	no	no	no	no	yes	yes	no
1347_a	no	yes	no	no	no	no	no	no	no	no	no	no
1348_a	no	yes	no	no	no	no	no	no	no	no	no	no
1348_b	no	yes	no	no	no	no	no	no	no	no	no	no
1348_c	no	yes	no	no	no	no	no	no	no	no	no	no
1348_d	no	yes	no	no	no	no	no	no	no	no	no	no
1350_a	no	no	no	no	no	no	no	no	no	no	no	no
1350_b	no	no	no	no	no	no	no	no	no	no	no	no
1350_c	no	no	no	no	no	no	no	no	no	no	no	no
1399_a	yes	yes	no	no	no	no	no	yes	no	no	no	no
1416_a	yes	no	no	no	no	no	yes	no	no	yes	no	no	x	shrubs, grasses, mosses	Unclear if they only looked at deciduous shrubs or also evergreen. Given that site description only mentions decidious species, only decidious included here.
1423_a	no	no	no	no	yes	no	no	no	no	no	no	no
1423_b	no	no	no	no	yes	no	no	no	no	no	no	no
1426_a	no	no	yes	no	no	no	yes	no	no	no	no	no	x	Carex_spp., Salix_spp., Eriophorum_angustifolium, Salix_lapponum
1426_e	no	no	yes	no	no	no	yes	no	no	no	no	no	--	Carex_spp., Salix_spp., Eriophorum_angustifolium, Salix_lapponum
1443_a	no	no	no	no	no	no	no	no	no	yes	yes	no
1444_a	yes	yes	no	no	no	no	yes	no	no	yes	no	yes
1444_b	yes	yes	no	no	no	no	yes	no	no	yes	no	yes
1444_c	yes	yes	no	no	no	no	yes	no	no	yes	no	yes
1444_d	yes	yes	no	no	no	no	yes	no	no	yes	no	yes
1445_a	no	no	yes	no	no	no	no	no	no	no	no	no
1445_b	no	no	yes	no	no	no	no	no	no	no	no	no
1448_a	no	no	no	no	no	no	yes	no	no	yes	no	no
1449_a	yes	yes	no	no	no	no	yes	yes	no	yes	no	yes
1453_a	yes	yes	no	no	no	no	yes	yes	no	no	no	no
1461_a	no	no	no	no	no	no	yes	yes	no	yes	no	no
1467_a	no	no	no	no	no	no	no	no	no	no	no	yes
1467_b	no	no	no	no	no	no	no	no	no	no	no	yes
1472_a	no	no	no	no	no	no	no	yes	no	no	no	no
1473_a	no	no	no	no	yes	no	no	no	no	no	no	no
1478_a	no	no	no	no	no	no	no	no	no	no	no	no
1484_a	no	no	no	no	no	no	no	no	no	no	yes	no
1484_b	no	no	no	no	no	no	no	no	no	no	yes	no
1484_c	no	no	no	no	no	no	no	no	no	no	yes	no
1488_a	yes	yes	no	no	no	no	no	yes	no	no	no	no
1492_a	no	no	no	no	yes	no	no	no	no	no	no	no
1492_b	no	no	no	no	yes	no	no	no	no	no	no	no
1536_a	no	no	yes	no	no	no	no	no	no	no	no	no
1539_a	no	no	no	no	no	no	no	yes	no	no	no	no
1539_b	no	no	no	no	no	no	no	yes	no	no	no	no
1548_a	yes	yes	no	no	no	no	yes	no	no	yes	no	yes
1556_a	no	no	no	no	no	no	no	no	no	no	no	yes
1563_a	no	no	no	no	no	no	no	no	no	yes	no	no
1574_a	no	no	no	no	no	no	no	no	no	no	no	no
1574_b	no	no	no	no	no	no	no	no	no	no	no	no
1574_c	no	no	no	no	no	no	no	no	no	no	no	no
1578_a	no	no	no	no	no	no	no	no	no	no	no	no
1578_b	no	no	no	no	no	no	no	no	no	no	no	no
1578_c	no	no	no	no	no	no	no	no	no	no	no	no
1578_d	no	no	no	no	no	no	no	no	no	no	no	no
1578_e	no	no	no	no	no	no	no	no	no	no	no	no
1578_f	no	no	no	no	no	no	no	no	no	no	no	no
1578_g	no	no	no	no	no	no	no	no	no	no	no	no
1578_h	no	no	no	no	no	no	no	no	no	no	no	no
1578_i	no	no	no	no	no	no	no	no	no	no	no	no
1578_j	no	no	no	no	no	no	no	no	no	no	no	no
1578_k	no	no	no	no	no	no	no	no	no	no	no	no
1587_a	yes	yes	yes	no	no	no	yes	yes	no	yes	no	yes	x	Salix_spp., Betula_nana, dwarf_shrubs, forbs, sedges, grass_leaves, grass_flowers, bryophytes, lichens	not clear what willow species - both dwarf and talll shrub categories marked
1587_b	yes	yes	yes	no	no	no	yes	yes	no	yes	no	yes	--	Salix_spp., Betula_nana, dwarf_shrubs, forbs, sedges, grass_leaves, grass_flowers, bryophytes, lichens	not clear what willow species - both dwarf and talll shrub categories marked
1587_c	yes	yes	yes	no	no	no	yes	yes	no	yes	no	yes	--	Salix_spp., Betula_nana, dwarf_shrubs, forbs, sedges, grass_leaves, grass_flowers, bryophytes, lichens	not clear what willow species - both dwarf and talll shrub categories marked
1590_a	no	yes	yes	no	no	no	yes	yes	no	no	yes	no
1599_a	no	no	no	no	no	no	no	no	no	no	no	no
1599_b	no	no	no	no	no	no	no	no	no	no	no	no
1601_a	no	no	no	no	no	no	yes	yes	no	no	no	no
1601_b	no	no	no	no	no	no	yes	yes	no	no	no	no
1645_a	no	yes	no	no	no	no	yes	yes	no	no	no	no
1663_a	yes	yes	yes	no	no	no	yes	yes	yes	no	no	no
1671_a	no	yes	no	no	no	no	no	no	no	no	no	no
1679_a	no	yes	no	no	no	no	yes	no	no	no	no	no
1679_b	no	yes	no	no	no	no	yes	no	no	no	no	no
1684_a	no	yes	no	no	no	no	no	yes	no	no	no	yes
1689_a	yes	yes	yes	no	yes	no	yes	yes	no	yes	no	no
1700_a	no	no	no	no	no	no	yes	no	no	no	no	no
1700_b	no	no	no	no	no	no	yes	no	no	no	no	no
1700_c	no	no	no	no	no	no	yes	no	no	no	no	no
1721_a	no	no	no	no	yes	no	no	no	no	no	no	no
1721_b	no	no	no	no	yes	no	no	no	no	no	no	no
1721_c	no	no	no	no	yes	no	no	no	no	no	no	no
1727_a	no	no	no	no	no	no	yes	no	no	no	no	no
1728_a	no	no	no	no	no	no	no	no	no	yes	yes	no
1728_b	no	no	no	no	no	no	no	no	no	yes	yes	no
1728_c	no	no	no	no	no	no	no	no	no	yes	yes	no
1752_a	no	no	no	no	no	no	no	no	no	no	no	no
1752_b	no	no	no	no	no	no	no	no	no	no	no	no
1752_c	no	no	no	no	no	no	no	no	no	no	no	no
1752_d	no	no	no	no	no	no	no	no	no	no	no	no
1752_e	no	no	no	no	no	no	no	no	no	no	no	no
1752_f	no	no	no	no	no	no	no	no	no	no	no	no
1752_g	no	no	no	no	no	no	no	no	no	no	no	no
1752_h	no	no	no	no	no	no	no	no	no	no	no	no
1752_i	no	no	no	no	no	no	no	no	no	no	no	no
1752_j	no	no	no	no	no	no	no	no	no	no	no	no
1770_a	yes	no	no	no	no	no	yes	yes	no	yes	no	yes
1776_a	yes	yes	no	no	no	no	yes	yes	no	no	no	no
1776_b	yes	yes	no	no	no	no	yes	yes	no	no	no	no
1776_c	yes	yes	no	no	no	no	yes	yes	no	no	no	no
1776_d	yes	yes	no	no	no	no	yes	yes	no	no	no	no
1776_e	yes	yes	no	no	no	no	yes	yes	no	no	no	no
1784_a	yes	yes	no	no	no	no	yes	yes	no	yes	no	yes
1798_a	no	yes	no	no	no	no	yes	yes	no	no	no	no
1798_b	no	yes	no	no	no	no	yes	yes	no	no	no	no
1811_a	no	no	no	no	no	no	yes	no	no	no	no	no
1812_a	yes	yes	no	no	no	no	yes	yes	no	yes	no	no
1812_b	yes	yes	no	no	no	no	yes	no	no	yes	no	no
1813_a	no	no	no	no	no	no	no	no	no	no	no	no
1813_b	no	no	no	no	no	no	no	no	no	no	no	no
1813_c	no	no	no	no	no	no	no	no	no	no	no	no
1813_d	no	no	no	no	no	no	no	no	no	no	no	no
1842_a	no	no	no	no	no	no	no	no	no	no	no	no
1842_b	no	no	no	no	no	no	no	no	no	no	no	no
1842_c	no	no	no	no	no	no	no	no	no	no	no	no
1842_d	no	no	no	no	no	no	no	no	no	no	no	no
1842_e	no	no	no	no	no	no	no	no	no	no	no	no
1842_f	no	no	no	no	no	no	no	no	no	no	no	no
1842_g	no	no	no	no	no	no	no	no	no	no	no	no
1842_h	no	no	no	no	no	no	no	no	no	no	no	no
1842_i	no	no	no	no	no	no	no	no	no	no	no	no
1842_j	no	no	no	no	no	no	no	no	no	no	no	no
1842_k	no	no	no	no	no	no	no	no	no	no	no	no
1842_l	no	no	no	no	no	no	no	no	no	no	no	no
1842_m	no	no	no	no	no	no	no	no	no	no	no	no
1842_n	no	no	no	no	no	no	no	no	no	no	no	no
1842_o	no	no	no	no	no	no	no	no	no	no	no	no
1842_p	no	no	no	no	no	no	no	no	no	no	no	no
1853_a	no	no	no	no	no	no	no	yes	no	no	no	yes
1855_a	no	no	no	no	no	no	yes	no	no	no	no	no
1881_a	no	no	no	no	no	no	no	no	no	no	no	no
1930_a	no	no	no	no	no	no	no	no	no	no	no	no
1930_b	no	no	no	no	no	no	no	no	no	no	no	no
1930_c	no	no	no	no	no	no	no	no	no	no	no	no
1930_d	no	no	no	no	no	no	no	no	no	no	no	no
1974_a	no	yes	no	no	no	no	no	no	no	no	no	no
2005_a	yes	yes	yes	no	yes	no	yes	yes	no	yes	no	yes
2005_b	yes	yes	yes	no	yes	no	yes	yes	no	yes	no	yes
2005_c	yes	yes	yes	no	yes	no	yes	yes	no	yes	no	yes
2006_a	no	no	no	no	no	no	no	no	no	no	no	yes
2006_b	no	no	no	no	no	no	no	no	no	no	no	yes
2006_c	no	no	no	no	no	no	no	no	no	no	no	yes
2013_a	no	no	yes	no	no	no	no	no	no	no	no	no
2020_a	no	no	no	no	no	no	yes	no	no	yes	no	no
2022_a	yes	yes	no	no	no	no	no	yes	no	no	no	no	x	Vaccinium_myrtillus, Betula_nana, Vaccinium_uliginosum, Empetrum_hermaphroditum, Vaccinium_vitis-idaea, decidious_shrubs, evergreen_shrubs, herbs
2040_a	no	no	no	no	no	no	yes	no	no	no	no	no
2043_a	yes	yes	no	no	no	no	yes	yes	no	yes	no	yes
2043_b	yes	yes	no	no	no	no	yes	yes	no	yes	no	yes
2043_c	yes	yes	no	no	no	no	yes	yes	no	yes	no	yes
2043_d	yes	yes	no	no	no	no	yes	yes	no	yes	no	yes
2044_a	yes	yes	no	no	no	no	yes	yes	no	yes	no	yes	x	graminoids, herbs, deciduous_shrubs, evergreen_shrubs, mosses, lichens
2044_b	yes	yes	no	no	no	no	yes	yes	no	yes	no	yes	--	graminoids, herbs, deciduous_shrubs, evergreen_shrubs, mosses, lichens
2057_a	no	no	no	no	no	no	no	no	no	no	yes	no
2057_b	no	no	no	no	no	no	no	no	no	no	yes	no
2061_a	no	no	no	no	no	no	yes	no	no	yes	no	no
2062_a	no	yes	no	no	no	no	yes	yes	yes	no	no	no
2062_b	no	no	no	no	no	no	yes	no	no	yes	yes	yes
2089_a	no	no	no	no	no	no	no	yes	no	no	no	no
2089_b	no	no	no	no	no	no	yes	no	no	no	no	no
2089_c	no	no	no	no	no	no	no	yes	no	no	no	no
2089_d	no	no	no	no	no	no	yes	no	no	no	no	no
2102_a	yes	no	no	no	no	no	no	no	no	no	no	no
2102_b	yes	no	no	no	no	no	no	no	no	no	no	no
2103_a	no	no	no	no	no	no	no	no	no	yes	no	yes
2112_a	no	no	no	no	yes	no	no	no	no	no	no	no
2128_a	no	no	no	no	no	no	yes	no	no	no	no	no
2128_b	no	no	no	no	no	no	yes	no	no	no	no	no
2128_c	no	no	no	no	no	no	no	no	no	no	yes	no
2129_a	no	no	no	no	no	no	yes	no	no	no	yes	no
2129_b	no	no	no	no	no	no	yes	no	no	no	yes	no
2129_c	no	no	no	no	no	no	yes	no	no	no	yes	no
2132_a	yes	yes	no	no	no	no	yes	no	no	no	yes	yes
2143_a	no	no	no	no	no	no	no	no	no	no	no	no
2180_a	no	yes	no	no	no	no	no	no	no	no	no	no
2182_a	no	yes	no	no	no	no	no	no	no	no	no	no
2182_b	no	yes	no	no	no	no	no	no	no	no	no	no
2190_a	no	no	no	no	no	no	no	no	no	yes	yes	yes
2192_a	no	yes	no	no	no	no	no	no	no	no	no	no
2193_a	no	no	yes	no	no	no	yes	yes	no	no	no	no
2193_b	no	no	yes	no	no	no	yes	yes	no	no	no	no
2198_a	no	no	no	no	no	no	no	no	no	no	no	no
2199_a	no	no	no	no	no	no	yes	no	no	no	no	no
2199_b	no	no	no	no	no	no	yes	no	no	no	no	no
2212_a	yes	yes	no	no	no	no	yes	yes	no	yes	no	yes
2212_b	yes	yes	no	no	no	no	yes	yes	no	yes	no	yes
2213_a	yes	yes	no	no	no	no	yes	yes	no	no	no	no	x	grasses, sedges, forbs, evergreen_shrubs, deciduous_ shrubs
2225_a	no	yes	no	no	no	no	no	no	no	no	no	no
2231_a	no	no	no	no	no	no	yes	no	no	no	no	no
2231_b	no	no	no	no	no	no	yes	no	no	no	no	no
2231_c	no	no	no	no	no	no	yes	no	no	no	no	no
2231_d	no	no	no	no	no	no	yes	no	no	no	no	no
2231_e	no	no	no	no	no	no	yes	no	no	no	no	no
2231_f	no	no	no	no	no	no	yes	no	no	no	no	no
2231_g	no	no	no	no	no	no	yes	no	no	no	no	no
2231_h	no	no	no	no	no	no	yes	no	no	no	no	no
2231_i	no	no	no	no	no	no	yes	no	no	no	no	no
2231_j	no	no	no	no	no	no	yes	no	no	no	no	no
2231_k	no	no	no	no	no	no	yes	no	no	no	no	no
2231_l	no	no	no	no	no	no	yes	no	no	no	no	no
2231_m	no	no	no	no	no	no	yes	no	no	no	no	no
2231_n	no	no	no	no	no	no	yes	no	no	no	no	no
2231_o	no	no	no	no	no	no	yes	no	no	no	no	no
2231_p	no	no	no	no	no	no	yes	no	no	no	no	no
2231_q	no	no	no	no	no	no	yes	no	no	no	no	no
2231_r	no	no	no	no	no	no	yes	no	no	no	no	no
2275_a	no	no	no	no	no	no	no	no	no	no	no	yes
2276_a	no	no	no	no	no	no	no	no	no	no	no	yes
2303_a	yes	yes	no	no	no	no	yes	yes	no	no	no	yes
2305_a	no	no	no	no	no	no	yes	no	no	no	no	no
2307_a	no	no	no	no	no	no	yes	no	no	no	no	no
2311_a	yes	yes	no	no	no	no	yes	yes	no	no	no	no	x	Geranium_sylvaticum, Polygonum_viviparum, Ranunculus_acris, other_herbs, graminoids, dwarf_shrubs
2311_b	yes	yes	no	no	no	no	yes	yes	no	no	no	no	--	Geranium_sylvaticum, Polygonum_viviparum, Ranunculus_acris, other_herbs, graminoids, dwarf_shrubs
2312_a	no	yes	no	no	no	no	yes	yes	no	yes	no	yes	x	grasses, sedges, forbs, evergreen_shrubs, deciduous_ shrubs
2312_b	no	yes	no	no	no	no	yes	yes	no	yes	no	yes	--	grasses, sedges, forbs, evergreen_shrubs, deciduous_ shrubs
2312_c	no	yes	no	no	no	no	yes	yes	no	yes	no	yes	--	grasses, sedges, forbs, evergreen_shrubs, deciduous_ shrubs
2312_d	no	yes	no	no	no	no	yes	yes	no	yes	no	yes	--	grasses, sedges, forbs, evergreen_shrubs, deciduous_ shrubs
2315_a	no	no	yes	no	no	no	no	no	no	no	no	no
2315_b	no	no	yes	no	no	no	no	no	no	no	no	no
2316_a	no	no	no	no	no	no	yes	no	no	no	no	no
2316_b	no	no	no	no	no	no	yes	no	no	no	no	no
2316_c	no	no	no	no	no	no	yes	no	no	no	no	no
2317_a	yes	no	no	no	no	no	yes	no	no	yes	no	yes	x	Long species list. See Table 2
2322_a	no	no	no	no	no	no	yes	no	no	no	no	no
2323_a	no	yes	no	no	no	no	no	no	no	no	no	no
2328_a	no	no	no	no	no	no	no	no	no	no	no	yes
2329_a	no	no	no	no	no	no	yes	no	no	yes	no	no
2364_a	no	no	no	no	no	no	yes	no	no	no	no	no
2407_a	no	no	no	no	no	no	yes	no	no	no	no	no
2419_a	no	no	no	no	no	no	yes	no	no	no	no	no
2419_b	no	no	no	no	no	no	yes	no	no	no	no	no
2467_a	no	no	no	no	no	no	no	no	no	no	no	no
2470_a	no	no	no	no	yes	no	no	no	no	no	no	no
2477_a	no	no	no	no	no	no	yes	no	no	no	no	no
2479_a	no	no	no	no	no	no	yes	no	no	no	no	no
2498_a	yes	yes	no	no	no	no	yes	yes	no	no	no	no	x	Long species list. See Table III
2520_a	no	no	no	no	no	no	yes	no	no	no	no	no
2525_a	no	yes	no	no	no	no	no	no	no	no	no	no
2526_a	yes	yes	no	no	yes	no	no	no	no	no	no	no
2534_a	yes	yes	no	no	no	no	yes	yes	yes	yes	no	no	x	Long species list. See Table 2
2534_b	no	no	no	no	no	no	no	no	no	no	no	no	--	Long species list. See Table 2
2534_c	no	no	no	no	no	no	no	no	no	no	no	no	--	Long species list. See Table 2
2534_d	no	no	no	no	no	no	no	no	no	no	no	no	--	Long species list. See Table 2
2534_e	no	no	no	no	no	no	no	no	no	no	no	no	--	Long species list. See Table 2
2538_a	no	no	no	no	no	no	no	no	no	no	no	no
2545_a	yes	yes	yes	no	yes	no	yes	yes	no	no	no	no	x	woody_plants, herbs, graminoids	Unclear - all columns for woody plants except evergreen trees marked. The study area is north of evergreen forests, but authors mention among others Betula pubescens (decidious_tree) and Salix glauca (decidious_tall_shrub), Vaccinium_myrtillus (decidious_dwarf_shrub). No junipers mentioned so tall_evergreen_shrubs not included. As the study area has Empetrum_nigrum as a common shrub, evergreen_dw…
2545_b	yes	yes	yes	no	yes	no	yes	yes	no	no	no	no	--	woody_plants, herbs, graminoids	Unclear - all columns for woody plants except evergreen trees marked. The study area is north of evergreen forests, but authors mention among others Betula pubescens (decidious_tree) and Salix glauca (decidious_tall_shrub), Vaccinium_myrtillus (decidious_dwarf_shrub). No junipers mentioned so tall_evergreen_shrubs not included. As the study area has Empetrum_nigrum as a common shrub, evergreen_dw…
2547_a	no	no	no	no	no	no	yes	no	no	no	no	no
2548_a	no	no	no	no	no	no	yes	no	no	no	no	no
2548_b	no	no	no	no	no	no	yes	no	no	no	no	no
2552_a	no	no	no	no	no	no	no	no	no	no	yes	no
2552_b	no	no	no	no	no	no	no	no	no	no	yes	no
2552_c	no	no	no	no	no	no	no	no	no	no	yes	no
2552_d	no	no	no	no	no	no	no	no	no	no	yes	no
2552_e	no	no	no	no	no	no	no	no	no	no	yes	no
2552_f	no	no	no	no	no	no	no	no	no	no	yes	no
2558_a	no	yes	no	no	no	no	no	no	no	no	no	no
2559_a	yes	yes	no	no	no	no	yes	yes	no	no	no	no	x	vascular_plants, woody_plants, herbs, graminoids, Cassiope_tetragona, Dryas_octopetala, Salix_polaris, Bistorta_vivipara, Luzula_arcuata, Alopecurus_borealis, Dupontia_fischeri
2559_b	yes	yes	no	no	no	no	yes	yes	no	no	no	no	--	vascular_plants, woody_plants, herbs, graminoids, Cassiope_tetragona, Dryas_octopetala, Salix_polaris, Bistorta_vivipara, Luzula_arcuata, Alopecurus_borealis, Dupontia_fischeri
2559_c	yes	yes	no	no	no	no	yes	yes	no	no	no	no	--	vascular_plants, woody_plants, herbs, graminoids, Cassiope_tetragona, Dryas_octopetala, Salix_polaris, Bistorta_vivipara, Luzula_arcuata, Alopecurus_borealis, Dupontia_fischeri
2559_d	yes	yes	no	no	no	no	yes	yes	no	no	no	no	--	vascular_plants, woody_plants, herbs, graminoids, Cassiope_tetragona, Dryas_octopetala, Salix_polaris, Bistorta_vivipara, Luzula_arcuata, Alopecurus_borealis, Dupontia_fischeri
2577_a	no	no	no	no	no	no	yes	yes	no	no	no	no	x	Poa_arctica, dicotyledons	not clear - no further description than dicotyledons
2577_b	no	no	no	no	no	no	yes	yes	no	no	no	no	--	Poa_arctica, dicotyledons	not clear - no further description than dicotyledons
2591_a	no	no	no	no	no	no	no	no	no	no	no	yes
2596_a	yes	yes	no	no	no	no	yes	yes	no	no	no	no	x	Long species list. See Table 5
2602_a	yes	yes	no	no	no	no	no	yes	no	no	no	no
2610_a	no	no	no	no	no	no	no	no	no	no	yes	no
2610_b	no	no	no	no	no	no	no	no	no	no	yes	no
2614_a	no	no	no	no	yes	no	no	no	no	no	no	no
2624_a	no	no	no	no	no	no	yes	no	no	no	no	no
2624_b	no	no	no	no	no	no	yes	no	no	no	no	no
2637_a	yes	yes	no	no	no	no	yes	yes	no	yes	no	yes	x	Long species/functional group list. See Table 4 and Figure 6
2639_a	no	no	no	no	no	no	yes	no	no	no	no	no
2640_a	no	no	no	no	no	no	yes	no	no	no	no	no
2643_a	no	no	yes	no	yes	no	yes	yes	yes	no	no	no	x	Long species list. See Table 1.
2669_a	no	no	no	no	no	no	yes	no	no	no	no	no
2681_a	no	no	yes	no	no	no	no	no	no	no	no	no			Salix_planifolia coded as tall shrub
2682_a	no	no	no	no	yes	no	no	no	no	no	no	no
2688_a	yes	yes	no	no	no	no	yes	yes	no	yes	no	yes	x	lichens, mosses, non_forage_shrub, forage_shrub, non_forage_graminoid, forage_graminoid, non_forage_forb, forage_forb
2691_a	no	no	no	no	no	no	yes	no	no	no	no	no
2693_a	no	no	no	no	no	no	yes	no	no	no	no	no
2698_a	no	no	no	no	no	no	yes	no	no	no	no	no
2728_a	no	no	no	no	yes	no	no	no	no	no	no	no
2728_b	no	no	no	no	yes	no	no	no	no	no	no	no
2728_c	no	no	no	no	yes	no	no	no	no	no	no	no
2735_a	no	no	no	no	no	no	yes	no	no	no	no	no
2741_a	yes	no	no	no	no	no	no	no	no	no	no	no
2741_b	yes	no	no	no	no	no	no	no	no	no	no	no
2750_a	no	no	no	no	no	no	no	yes	no	no	no	no
2750_b	no	no	no	no	no	no	no	yes	no	no	no	no
2761_a	yes	no	no	no	no	no	no	no	no	no	no	no
2814_a	yes	yes	no	no	no	no	yes	yes	yes	yes	no	yes	x	Long species list. See appendix.
2814_b	yes	yes	no	no	no	no	yes	yes	yes	yes	no	yes	--	Long species list. See appendix.
2814_c	yes	yes	no	no	no	no	yes	yes	yes	yes	no	yes	--	Long species list. See appendix.
2816_a	yes	no	yes	no	no	no	yes	no	no	no	no	no
2861_a	yes	no	no	no	no	no	no	no	no	no	no	no
2864_a	yes	yes	no	no	no	no	yes	yes	no	yes	no	yes	x	lichens, shrubs, graminoids_and_forbs, mosses, other
2873_a	no	no	no	no	no	no	yes	no	no	no	no	no
2909_a	no	no	no	no	no	no	no	no	no	no	yes	no
2909_b	no	no	no	no	no	no	no	no	no	no	yes	no
2912_a	no	no	no	no	yes	no	no	no	no	no	no	no
2954_a	no	no	no	no	yes	no	no	no	no	no	no	no
2954_b	no	no	no	no	yes	no	no	no	no	no	no	no
2954_c	no	no	no	no	yes	no	no	no	no	no	no	no
2954_d	no	no	no	no	yes	no	no	no	no	no	no	no
2954_e	no	no	no	no	yes	no	no	no	no	no	no	no
2960_a	yes	yes	no	no	no	no	yes	yes	no	yes	no	yes	x	Long species list. See Table 1
2960_b	yes	yes	no	no	no	no	yes	yes	no	yes	no	yes	--	Long species list. See Table 1
2961_a	no	no	yes	no	no	no	no	no	no	no	no	no
2963_a	no	no	no	no	no	no	yes	no	no	yes	no	no
2963_b	no	no	no	no	no	no	yes	no	no	yes	no	no
3014_a	yes	yes	no	no	no	no	yes	yes	no	no	no	no	x	woody_plants, prostrate_herbs, low_herbs, rosette_herbs, tall_herbs, rhizomatous_graminoids, tall_graminoids
3014_b	yes	yes	no	no	no	no	yes	yes	no	no	no	no	--	woody_plants, prostrate_herbs, low_herbs, rosette_herbs, tall_herbs, rhizomatous_graminoids, tall_graminoids
3030_a	no	no	no	no	no	no	yes	no	no	no	no	no
3032_a	no	no	no	no	no	no	yes	no	no	no	no	no
3045_a	no	no	no	no	no	no	no	yes	no	no	no	no
3045_b	no	no	no	no	no	no	no	yes	no	no	no	no
3083_a	no	no	no	no	no	no	yes	no	no	no	no	no
3085_a	no	no	no	no	no	no	yes	yes	no	no	no	no
3104_a	no	no	no	no	no	no	yes	no	no	no	no	no
3104_b	no	no	no	no	no	no	yes	no	no	no	no	no
3116_a	no	no	no	no	no	no	yes	no	no	no	no	no
3130_a	no	no	no	no	no	no	yes	no	no	no	no	no
3138_a	no	no	no	no	no	no	no	no	no	yes	yes	no
3138_b	no	no	no	no	no	no	no	no	no	yes	yes	no
3138_c	no	no	no	no	no	no	no	no	no	yes	no	no
3142_a	no	yes	no	no	no	no	yes	yes	no	yes	no	no	x	for a list of species see Table 4	Unclear - only Salix sp. mentioned. But the paper has a photo of the site which has no tall shrubs or trees, so only dwarf shrubs are included here
3142_b	no	yes	no	no	no	no	yes	yes	no	yes	no	no	--	for a list of species see Table 4	Unclear - only Salix sp. mentioned. But the paper has a photo of the site which has no tall shrubs or trees, so only dwarf shrubs are included here
3147_a	no	no	no	no	yes	no	no	no	no	no	no	no
3156_a	yes	yes	no	no	no	no	yes	no	no	no	no	no
3159_a	no	no	no	no	no	no	yes	no	no	no	no	no
3161_a	no	no	yes	no	no	no	yes	no	no	yes	no	yes
3161_b	yes	no	yes	no	no	no	yes	yes	no	no	no	no
3168_a	no	no	no	no	no	no	yes	no	no	no	no	no
3172_a	no	yes	yes	no	no	no	no	no	no	no	no	no	x	Salix_spp
3183_a	no	no	no	no	no	no	yes	no	no	no	no	no
3204_a	no	no	no	no	no	no	no	no	no	no	yes	no
3206_a	yes	yes	no	no	no	no	yes	yes	no	yes	no	yes	x	graminoids, woody_plants, lichens, moss, Anthoxanthum_odoratum, Carex_bigelowii, Carex_lachenalii, Luzula_multiflora_frigida, Polygonum_viviparum, Salix_herbaceae, Vaccinium_vitis-idaea, Conostomum_tetragonum, Dicranum_spp, Kiaeria_spp, Hepaticae, Pohlia_spp, Polytrichum_alpinum, Polytrichum_juniperinum, Polytrichum_norvegicum, Cetraria_delisei, Cetraria_islandica, Clasina_mitis, Cladonia_spp, Le…
3213_a	no	no	no	no	no	no	no	no	no	yes	yes	yes
3213_b	no	no	no	no	no	no	yes	no	no	yes	yes	yes
3213_c	no	no	no	no	no	no	no	no	no	yes	yes	yes
3213_d	no	no	no	no	no	no	yes	no	no	yes	yes	yes
3213_e	no	no	no	no	no	no	no	no	no	yes	yes	yes
3213_f	no	no	no	no	no	no	yes	no	no	yes	yes	yes
3213_g	no	no	no	no	no	no	no	no	no	yes	yes	yes
3213_h	no	no	no	no	no	no	yes	no	no	yes	yes	yes
3213_i	no	no	no	no	no	no	no	no	no	yes	yes	yes
3221_a	no	no	no	no	no	yes	no	no	no	no	no	no
3225_a	no	yes	no	no	no	no	no	yes	no	no	no	no
3227_a	no	no	yes	no	no	no	yes	no	yes	yes	no	no	x	Carex, Equisetum, Dupontia, Eriophorum, Salix, mosses
3273_a	no	no	no	no	no	no	no	no	no	no	yes	no
3359_a	yes	yes	no	no	no	no	yes	yes	no	no	no	no
3359_b	yes	yes	no	no	no	no	yes	yes	no	no	no	no
3359_c	yes	yes	no	no	no	no	yes	yes	no	no	no	no
3359_d	yes	yes	no	no	no	no	yes	yes	no	no	no	no
3359_e	yes	yes	no	no	no	no	yes	yes	no	no	no	no
3359_f	yes	yes	no	no	no	no	yes	yes	no	no	no	no
3359_g	yes	yes	no	no	no	no	yes	yes	no	no	no	no
3359_h	yes	yes	no	no	no	no	yes	yes	no	no	no	no
3386_a	yes	yes	no	no	yes	no	yes	yes	no	yes	no	yes	x	shrubs, graminoids, herbs, lichen, moss. List of species in Table 3 (page 22)
3386_b	yes	yes	no	no	yes	no	yes	yes	no	yes	no	yes	--	shrubs, graminoids, herbs, lichen, moss. List of species in Table 3 (page 22)
3411_a	yes	yes	no	no	no	no	yes	yes	yes	yes	no	yes	x	lichens, graminoids, forbs, mosses, dwarf_shrubs
3411_b	yes	yes	no	no	no	no	yes	yes	yes	yes	no	yes	--	lichens, graminoids, forbs, mosses, dwarf_shrubs
3411_c	yes	yes	no	no	no	no	yes	yes	no	yes	no	yes	--	lichens, graminoids, forbs, mosses, dwarf_shrubs
3415_a	yes	yes	no	no	yes	no	yes	yes	yes	yes	no	yes	x	grasses, grasslike_plants, forbs, shrubs, mosses, lichens, species list available (pages 4-7)
3415_b	yes	yes	no	no	yes	no	yes	yes	yes	yes	no	yes	--	grasses, grasslike_plants, forbs, shrubs, mosses, lichens, species list available (pages 4-7)
3415_c	yes	yes	no	no	yes	no	yes	yes	yes	yes	no	yes	--	grasses, grasslike_plants, forbs, shrubs, mosses, lichens, species list available (pages 4-7)
3415_d	yes	yes	no	no	yes	no	yes	yes	yes	yes	no	yes	--	grasses, grasslike_plants, forbs, shrubs, mosses, lichens, species list available (pages 4-7)
3415_e	yes	yes	no	no	yes	no	yes	yes	yes	yes	no	yes	--	grasses, grasslike_plants, forbs, shrubs, mosses, lichens, species list available (pages 4-7)
3415_f	yes	yes	no	no	yes	no	yes	yes	yes	yes	no	yes	--	grasses, grasslike_plants, forbs, shrubs, mosses, lichens, species list available (pages 4-7)
3415_g	yes	yes	no	no	yes	no	yes	yes	yes	yes	no	yes	--	grasses, grasslike_plants, forbs, shrubs, mosses, lichens, species list available (pages 4-7)
3415_h	yes	yes	no	no	yes	no	yes	yes	yes	yes	no	yes	--	grasses, grasslike_plants, forbs, shrubs, mosses, lichens, species list available (pages 4-7)
3415_i	yes	yes	no	no	yes	no	yes	yes	yes	yes	no	yes	--	grasses, grasslike_plants, forbs, shrubs, mosses, lichens, species list available (pages 4-7)
3415_j	yes	yes	no	no	yes	no	yes	yes	yes	yes	no	yes	--	grasses, grasslike_plants, forbs, shrubs, mosses, lichens, species list available (pages 4-7)
3415_k	yes	yes	no	no	yes	no	yes	yes	yes	yes	no	yes	--	grasses, grasslike_plants, forbs, shrubs, mosses, lichens, species list available (pages 4-7)
3415_l	yes	yes	no	no	yes	no	yes	yes	yes	yes	no	yes	--	grasses, grasslike_plants, forbs, shrubs, mosses, lichens, species list available (pages 4-7)
3415_m	yes	yes	no	no	yes	no	yes	yes	yes	yes	no	yes	--	grasses, grasslike_plants, forbs, shrubs, mosses, lichens, species list available (pages 4-7)
3415_n	yes	yes	no	no	yes	no	yes	yes	yes	yes	no	yes	--	grasses, grasslike_plants, forbs, shrubs, mosses, lichens, species list available (pages 4-7)
3415_o	yes	yes	no	no	yes	no	yes	yes	yes	yes	no	yes	--	grasses, grasslike_plants, forbs, shrubs, mosses, lichens, species list available (pages 4-7)
3415_p	yes	yes	no	no	yes	no	yes	yes	yes	yes	no	yes	--	grasses, grasslike_plants, forbs, shrubs, mosses, lichens, species list available (pages 4-7)
3415_q	yes	yes	no	no	yes	no	yes	yes	yes	yes	no	yes	--	grasses, grasslike_plants, forbs, shrubs, mosses, lichens, species list available (pages 4-7)
3415_r	yes	yes	no	no	yes	no	yes	yes	yes	yes	no	yes	--	grasses, grasslike_plants, forbs, shrubs, mosses, lichens, species list available (pages 4-7)
3415_s	yes	yes	no	no	yes	no	yes	yes	yes	yes	no	yes	--	grasses, grasslike_plants, forbs, shrubs, mosses, lichens, species list available (pages 4-7)
3415_t	yes	yes	no	no	yes	no	yes	yes	yes	yes	no	yes	--	grasses, grasslike_plants, forbs, shrubs, mosses, lichens, species list available (pages 4-7)
3415_u	yes	yes	no	no	yes	no	yes	yes	yes	yes	no	yes	--	grasses, grasslike_plants, forbs, shrubs, mosses, lichens, species list available (pages 4-7)
3425_a	yes	yes	yes	no	yes	no	yes	yes	yes	no	no	no
3425_b	yes	yes	yes	no	yes	no	yes	yes	yes	no	no	no
3425_c	yes	yes	no	no	no	no	yes	no	yes	no	no	no
3425_d	yes	yes	yes	no	yes	no	yes	yes	yes	no	no	no
3425_m	yes	yes	no	no	yes	no	yes	yes	no	yes	no	yes
3425_n	yes	yes	yes	no	yes	no	yes	yes	yes	yes	no	yes
3425_o	yes	yes	yes	no	yes	no	yes	yes	yes	yes	no	yes
3425_p	yes	yes	yes	no	yes	no	yes	yes	yes	yes	no	yes
3425_q	yes	yes	yes	no	yes	no	yes	yes	yes	yes	no	yes
3425_r	yes	yes	yes	no	yes	no	yes	yes	yes	yes	no	yes
3425_s	yes	yes	yes	no	yes	no	yes	yes	yes	yes	no	yes
3425_t	yes	yes	yes	no	yes	no	yes	yes	yes	yes	no	yes
3425_u	yes	yes	yes	no	yes	no	yes	yes	yes	yes	no	yes
3427_a	yes	yes	no	no	no	no	yes	yes	no	yes	no	yes
3427_b	yes	yes	no	no	no	no	yes	yes	no	yes	no	yes
3427_c	yes	yes	no	no	no	no	yes	yes	no	yes	no	yes
3427_d	yes	yes	no	no	no	no	yes	yes	no	yes	no	yes
3427_e	yes	yes	no	no	no	no	yes	yes	no	yes	no	yes
3427_h	yes	yes	no	no	no	no	yes	yes	no	yes	no	yes
3427_i	yes	yes	no	no	no	no	yes	yes	no	yes	no	yes
3427_j	yes	yes	no	no	no	no	yes	yes	no	yes	no	yes
3427_k	yes	yes	no	no	no	no	yes	yes	no	yes	no	yes
3427_l	yes	yes	no	no	no	no	yes	yes	no	yes	no	yes
3427_r	yes	yes	no	no	no	no	yes	yes	no	yes	no	yes
3428_a	no	yes	no	no	yes	no	no	no	no	no	no	no
3428_b	yes	yes	no	no	no	no	yes	yes	no	yes	no	yes
3430_a	no	no	no	no	no	no	no	no	no	no	yes	no
3493_a	no	yes	no	no	no	no	yes	yes	no	yes	no	yes
3508_a	yes	yes	yes	no	no	no	yes	yes	no	no	no	no
3508_b	yes	yes	yes	no	no	no	yes	yes	no	no	no	no
3508_c	yes	yes	yes	no	no	no	yes	yes	no	no	no	no
3508_d	yes	yes	yes	no	no	no	yes	yes	no	no	no	no
3508_e	yes	yes	yes	no	no	no	yes	yes	no	no	no	no
3508_f	yes	yes	yes	no	no	no	yes	yes	no	no	no	no
3508_g	no	no	no	no	no	no	no	no	no	no	no	no
3508_h	no	no	no	no	no	no	no	no	no	no	no	no
3508_i	no	no	no	no	no	no	no	no	no	no	no	no
3508_j	no	no	no	no	no	no	no	no	no	no	no	no
3508_k	no	no	no	no	no	no	no	no	no	no	no	no
3508_l	no	no	no	no	no	no	no	no	no	no	no	no
3508_m	no	no	no	no	no	no	no	no	no	no	no	no
3508_n	no	no	no	no	no	no	no	no	no	no	no	no
3508_o	no	no	no	no	no	no	no	no	no	no	no	no
3508_p	no	no	no	no	no	no	no	no	no	no	no	no
3508_q	no	no	no	no	no	no	no	no	no	no	no	no
3508_r	no	no	no	no	no	no	no	no	no	no	no	no
3509_a	no	no	no	no	no	no	no	no	no	yes	no	no
3509_b	no	no	no	no	no	no	no	no	no	yes	no	no
3509_c	no	no	no	no	no	no	no	no	no	yes	no	no
3509_d	no	no	no	no	no	no	no	no	no	yes	no	no
3509_e	no	no	no	no	no	no	no	no	no	yes	no	no
3509_f	no	no	no	no	no	no	no	no	no	yes	no	no
3510_a	no	no	no	no	yes	no	no	no	no	no	no	no
3510_b	no	no	no	no	yes	no	no	no	no	no	no	no
3538_a	no	no	no	no	no	no	no	no	no	no	no	yes
3539_a	yes	yes	yes	no	no	no	yes	yes	no	no	no	yes		shrubs, grasses, lichens	lichens, erect shrubs, dwarf shrubs, forbs
3539_b	yes	yes	yes	no	no	no	yes	yes	no	no	no	yes		shrubs, grasses, lichens	lichens, erect shrubs, dwarf shrubs, forbs
3539_c	yes	yes	yes	no	no	no	yes	yes	no	no	no	yes		shrubs, grasses, lichens	lichens, erect shrubs, dwarf shrubs, forbs
3541_a	no	no	no	no	no	no	no	no	no	no	no	yes
3556_a	no	no	no	no	no	no	no	no	no	no	yes	yes
3557_a	yes	yes	no	no	no	no	yes	no	no	yes	yes	yes		lichens, plants, moss, grasses, dwarf-shrubs	study reports mosses, dwarf-shrubs, and herbaceous plants, but the species are not described
3557_b	yes	yes	no	no	no	no	yes	no	no	yes	yes	yes		lichens, plants, moss, grasses, dwarf-shrubs	study reports mosses, dwarf-shrubs, and herbaceous plants, but the species are not described
3557_c	yes	yes	no	no	no	no	yes	no	no	yes	yes	yes		lichens, plants, moss, grasses, dwarf-shrubs	study reports mosses, dwarf-shrubs, and herbaceous plants, but the species are not described
3557_d	yes	yes	no	no	no	no	yes	no	no	yes	yes	yes		lichens, plants, moss, grasses, dwarf-shrubs	study reports mosses, dwarf-shrubs, and herbaceous plants, but the species are not described
3557_e	yes	yes	no	no	no	no	yes	no	no	yes	yes	yes		lichens, plants, moss, grasses, dwarf-shrubs	study reports mosses, dwarf-shrubs, and herbaceous plants, but the species are not described
3557_f	yes	yes	no	no	no	no	yes	no	no	yes	yes	yes		lichens, plants, moss, grasses, dwarf-shrubs	study reports mosses, dwarf-shrubs, and herbaceous plants, but the species are not described
3557_g	yes	yes	no	no	no	no	yes	no	no	yes	yes	yes		lichens, plants, moss, grasses, dwarf-shrubs	study reports mosses, dwarf-shrubs, and herbaceous plants, but the species are not described
3557_h	yes	yes	no	no	no	no	yes	no	no	yes	yes	yes		lichens, plants, moss, grasses, dwarf-shrubs	study reports mosses, dwarf-shrubs, and herbaceous plants, but the species are not described
3563_a	no	no	no	no	no	no	no	no	no	no	yes	no		different groups of plants	results reported as totals per vegetation type
3565_a	no	yes	no	no	no	no	no	no	no	no	no	no
3568_c	no	no	no	no	no	no	no	no	no	yes	no	yes
3568_d	no	no	no	no	no	no	no	no	no	yes	no	yes
3568_e	no	no	no	no	no	no	no	no	no	yes	no	yes
3569_a	yes	no	no	no	no	no	yes	no	no	no	no	no
3575_a	no	no	no	no	no	no	yes	no	no	no	no	no
3575_b	no	no	no	no	no	no	yes	no	no	no	no	no
3580_a	yes	yes	yes	no	yes	no	yes	yes	no	no	no	no	x	green_sedges, dead_sedges, shrubs, forbs
3580_b	yes	yes	yes	no	yes	no	yes	yes	no	no	no	no	--	green_sedges, dead_sedges, shrubs, forbs
3581_a	no	no	no	no	no	no	no	no	no	no	no	yes
3586_a	no	no	no	no	no	no	yes	yes	yes	yes	no	no

## Sheet: comments
variable	comment
evidence_point_ID	e.g. 23_a, 23_b, 3012_a
evergreen_dwarf_shrubs	e.g. empetrum nigrum, vaccinium vitis-ideae
decidious_dwarf_shrubs	e.g. vaccinium myrtillus, betula nana. Also decidious prostrate shrubs, such as salix herbaceae
decidious_tall_shrubs	e.g. tall salix
evergreen_tall_shrubs	e.g. juniperus
decidious_trees	e.g. betula pubescens ssp. czerepanovii, larix
evergreen_trees	e.g. picea, pinus
graminoids	including grasses, sedges, rushes
forbs	including nitrogen fixers and hemiparasites
ferns_and_allies	including horsetails; i.e. all vascular plants with spores instead of seeds
bryophytes	mosses; either sinlge species of mosses or entire bryophyte community
vascular_plant_community	vascular plants not reported per species/group but eg. "biomass of vascular plants"
lichens	either single species or entire lichen community
original_study_text_checked	Whether study text was checked in addition to coded data. Done systematically for evindence points that had the scored data of "woody_plants", "shubs", "Salix spp.", "dwarf_shrubs", "dicotyledons" or "Long_species_list", original articles were checked and marked with "x"
original_scored_data	scored data is reported if original papers had to be checked
comments
For all plant columns, score yes/no, depending if the evidence point reports results on this plant group. So one evidence point can have several "yes"
Data entry = Katrín Björnsdóttir - katbjo@gmail.com; katrin.bjornsdottir@bioenv.gu.se
Studies in Russian (ID 3539, 3557, 3563) checked by Dorothee Ehrich - dorothee.ehrich@uit.no
